# Supplementary material
Source: PubMed Central journal article supplement (PMC5347426)
Supplement: Alpl_cKO_Supp_Table_1_6-27-16.pdf [file Alpl_cKO_Supp_Table_1_6-27-16.pdf]

**Appendix Table 1. Micro-CT analysis of cortical midshaft bone from *Col1a1*-cKO and *Prx1*-cKO mice versus WT controls.** Mean values  $\pm$  standard deviation are shown for *Col1a1*- and *Prx1*-cKO mice and their respective WT controls (n=2-4 for each genotype at 24 wks) for humerus, femur, and tibia cortical midshaft bone, with statistically significantly different values ( $p < 0.05$  by independent samples t-test) indicated by bold type.

|                    | <b>T.Ar</b><br>(mm <sup>2</sup> ) | <b>B.Ar</b><br>(mm <sup>2</sup> ) | <b>B.Ar/T.Ar</b><br>(%)            | <b>Cs.Th</b><br>(mm)              | <b>MMI</b><br>(mm <sup>4</sup> )  | <b>Ct.Po</b><br>(%)                | <b>TMD</b><br>(g HA/cm <sup>3</sup> ) |
|--------------------|-----------------------------------|-----------------------------------|------------------------------------|-----------------------------------|-----------------------------------|------------------------------------|---------------------------------------|
| <b>Humerus</b>     |                                   |                                   |                                    |                                   |                                   |                                    |                                       |
| WT                 | 1.65 $\pm$ 0.12                   | <b>0.70 <math>\pm</math> 0.07</b> | <b>42.45 <math>\pm</math> 2.59</b> | <b>0.16 <math>\pm</math> 0.01</b> | 0.30 $\pm$ 0.07                   | <b>35.21 <math>\pm</math> 3.02</b> | <b>1.23 <math>\pm</math> 0.04</b>     |
| <i>Col1a1</i> -cKO | 1.66 $\pm$ 0.25                   | <b>0.48 <math>\pm</math> 0.11</b> | <b>28.71 <math>\pm</math> 3.11</b> | <b>0.10 <math>\pm</math> 0.01</b> | 0.22 $\pm$ 0.10                   | <b>46.98 <math>\pm</math> 0.79</b> | <b>1.13 <math>\pm</math> 0.03</b>     |
| WT                 | 1.71 $\pm$ 0.27                   | <b>0.76 <math>\pm</math> 0.05</b> | 45.45 $\pm$ 4.05                   | <b>0.15 <math>\pm</math> 0.00</b> | <b>0.39 <math>\pm</math> 0.04</b> | 36.24 $\pm$ 0.80                   | 1.14 $\pm$ 0.01                       |
| <i>Prx1</i> -cKO   | 1.53 $\pm$ 0.02                   | <b>0.43 <math>\pm</math> 0.02</b> | 27.80 $\pm$ 1.04                   | <b>0.09 <math>\pm</math> 0.02</b> | <b>0.19 <math>\pm</math> 0.01</b> | 22.26 $\pm$ 7.18                   | 1.02 $\pm$ 0.05                       |
| <b>Femur</b>       |                                   |                                   |                                    |                                   |                                   |                                    |                                       |
| WT                 | 1.76 $\pm$ 0.11                   | <b>0.80 <math>\pm</math> 0.03</b> | <b>45.35 <math>\pm</math> 1.57</b> | <b>0.17 <math>\pm</math> 0.01</b> | 0.39 $\pm$ 0.07                   | 55.50 $\pm$ 4.18                   | 1.23 $\pm$ 0.08                       |
| <i>Col1a1</i> -cKO | 1.86 $\pm$ 0.17                   | <b>0.63 <math>\pm</math> 0.08</b> | <b>33.91 <math>\pm</math> 2.15</b> | <b>0.12 <math>\pm</math> 0.01</b> | 0.36 $\pm$ 0.10                   | 61.88 $\pm$ 7.08                   | 1.14 $\pm$ 0.04                       |
| WT                 | 1.76 $\pm$ 0.22                   | 0.81 $\pm$ 0.04                   | 46.53 $\pm$ 3.24                   | <b>0.16 <math>\pm</math> 0.00</b> | 0.45 $\pm$ 0.09                   | 59.13 $\pm$ 3.20                   | 1.16 $\pm$ 0.03                       |
| <i>Prx1</i> -cKO   | 1.77 $\pm$ 0.35                   | 0.57 $\pm$ 0.07                   | 32.51 $\pm$ 2.56                   | <b>0.11 <math>\pm</math> 0.01</b> | 0.40 $\pm$ 0.08                   | 13.45 $\pm$ 13.42                  | 1.11 $\pm$ 0.01                       |
| <b>Tibia</b>       |                                   |                                   |                                    |                                   |                                   |                                    |                                       |
| WT                 | 1.87 $\pm$ 0.18                   | <b>0.69 <math>\pm</math> 0.07</b> | <b>36.86 <math>\pm</math> 0.75</b> | <b>0.14 <math>\pm</math> 0.00</b> | 0.35 $\pm$ 0.11                   | 49.59 $\pm$ 1.93                   | <b>1.17 <math>\pm</math> 0.02</b>     |
| <i>Col1a1</i> -cKO | 1.88 $\pm$ 0.22                   | <b>0.50 <math>\pm</math> 0.06</b> | <b>26.59 <math>\pm</math> 2.80</b> | <b>0.09 <math>\pm</math> 0.01</b> | 0.29 $\pm$ 0.09                   | 40.34 $\pm$ 24.91                  | <b>1.08 <math>\pm</math> 0.02</b>     |
| WT                 | 1.89 $\pm$ 0.31                   | <b>0.76 <math>\pm</math> 0.04</b> | 40.73 $\pm$ 4.55                   | <b>0.14 <math>\pm</math> 0.00</b> | 0.46 $\pm$ 0.10                   | <b>50.49 <math>\pm</math> 5.05</b> | 1.12 $\pm$ 0.01                       |
| <i>Prx1</i> -cKO   | 1.58 $\pm$ 0.24                   | <b>0.46 <math>\pm</math> 0.01</b> | 30.09 $\pm$ 4.79                   | <b>0.10 <math>\pm</math> 0.00</b> | 0.20 $\pm$ 0.01                   | <b>2.06 <math>\pm</math> 1.79</b>  | 1.01 $\pm$ 0.04                       |

HA= Hydroxyapatite

T.Ar = Cross-sectional tissue area

B.Ar = Cross-sectional cortical bone area

B.Ar/T.Ar = Cortical bone area fraction

Cs.Th = Cross-sectional bone thickness

MMI = Polar moment of inertia

Ct.Po = cortical porosity

TMD = Tissue mineral density
