# Supplementary material
Source: PubMed Central journal article supplement (PMC5347426)
Supplement: Alpl_cKO_Supp_Table_2_6-27-16.pdf [file Alpl_cKO_Supp_Table_2_6-27-16.pdf]

**Appendix Table 2. Micro-CT analysis of bone metaphyses from *Col1a1*-cKO and *Prx1*-cKO mice versus their respective WT controls.** Mean values  $\pm$  standard deviation are shown for *Col1a1*- and *Prx1*-cKO mice and their respective WT controls (n=2-4 for each genotype at 24 wks) for humerus, femur, and tibia metaphyses, with statistically significantly different values ( $p < 0.05$  by independent samples t-test) indicated by bold type.

|                    | TV<br>(mm <sup>3</sup> )          | BV<br>(mm <sup>3</sup> ) | BV/TV<br>(%)    | Tb.Th<br>(mm)                     | Tb.Sp<br>(mm)                     | Tb.N<br>(1/mm)  | SMI                               | Tb.Pf<br>(1/mm)                    | BMD<br>(g HA/cm <sup>3</sup> )    |
|--------------------|-----------------------------------|--------------------------|-----------------|-----------------------------------|-----------------------------------|-----------------|-----------------------------------|------------------------------------|-----------------------------------|
| <b>Humerus</b>     |                                   |                          |                 |                                   |                                   |                 |                                   |                                    |                                   |
| WT                 | <b>1.23 <math>\pm</math> 0.09</b> | 0.02 $\pm$ 0.01          | 1.84 $\pm$ 0.94 | 0.04 $\pm$ 0.00                   | 0.46 $\pm$ 0.10                   | 0.47 $\pm$ 0.23 | 2.52 $\pm$ 0.17                   | 37.76 $\pm$ 5.17                   | 0.10 $\pm$ 0.03                   |
| <i>Col1a1</i> -cKO | <b>1.79 <math>\pm</math> 0.20</b> | 0.02 $\pm$ 0.01          | 1.02 $\pm$ 0.66 | 0.04 $\pm$ 0.00                   | 0.67 $\pm$ 0.13                   | 0.26 $\pm$ 0.15 | 2.54 $\pm$ 0.16                   | 40.85 $\pm$ 3.49                   | 0.07 $\pm$ 0.02                   |
| WT                 | 1.44 $\pm$ 0.21                   | 0.02 $\pm$ 0.01          | 1.50 $\pm$ 0.34 | 0.04 $\pm$ 0.00                   | 0.43 $\pm$ 0.05                   | 0.39 $\pm$ 0.07 | <b>2.71 <math>\pm</math> 0.05</b> | <b>40.58 <math>\pm</math> 0.87</b> | 0.08 $\pm$ 0.01                   |
| <i>Prx1</i> -cKO   | 2.04 $\pm$ 0.30                   | 0.06 $\pm$ 0.01          | 2.95 $\pm$ 0.10 | 0.04 $\pm$ 0.00                   | 0.49 $\pm$ 0.07                   | 0.69 $\pm$ 0.00 | <b>2.41 <math>\pm</math> 0.01</b> | <b>33.24 <math>\pm</math> 0.78</b> | 0.10 $\pm$ 0.01                   |
| <b>Femur</b>       |                                   |                          |                 |                                   |                                   |                 |                                   |                                    |                                   |
| WT                 | 2.60 $\pm$ 0.39                   | 0.16 $\pm$ 0.09          | 6.27 $\pm$ 3.48 | 0.05 $\pm$ 0.00                   | <b>0.31 <math>\pm</math> 0.07</b> | 1.38 $\pm$ 0.74 | 2.20 $\pm$ 0.21                   | 27.84 $\pm$ 3.83                   | <b>0.16 <math>\pm</math> 0.05</b> |
| <i>Col1a1</i> -cKO | 4.23 $\pm$ 1.10                   | 0.07 $\pm$ 0.02          | 1.61 $\pm$ 0.31 | 0.04 $\pm$ 0.01                   | <b>0.58 <math>\pm</math> 0.07</b> | 0.37 $\pm$ 0.05 | 2.38 $\pm$ 0.19                   | 34.47 $\pm$ 5.89                   | <b>0.08 <math>\pm</math> 0.00</b> |
| WT                 | 3.19 $\pm$ 0.49                   | 0.23 $\pm$ 0.01          | 6.87 $\pm$ 1.87 | 0.05 $\pm$ 0.01                   | <b>0.25 <math>\pm</math> 0.01</b> | 1.51 $\pm$ 0.26 | 2.23 $\pm$ 0.17                   | 29.87 $\pm$ 6.59                   | 0.16 $\pm$ 0.02                   |
| <i>Prx1</i> -cKO   | 5.84 $\pm$ 0.79                   | 0.38 $\pm$ 0.18          | 6.29 $\pm$ 2.17 | 0.06 $\pm$ 0.01                   | <b>0.38 <math>\pm</math> 0.01</b> | 1.09 $\pm$ 0.26 | 2.32 $\pm$ 0.12                   | 26.37 $\pm$ 5.06                   | 0.15 $\pm$ 0.03                   |
| <b>Tibia</b>       |                                   |                          |                 |                                   |                                   |                 |                                   |                                    |                                   |
| WT                 | <b>1.42 <math>\pm</math> 0.15</b> | 0.05 $\pm$ 0.04          | 3.64 $\pm$ 2.95 | 0.04 $\pm$ 0.00                   | <b>0.39 <math>\pm</math> 0.12</b> | 0.89 $\pm$ 0.72 | 2.41 $\pm$ 0.35                   | 35.22 $\pm$ 8.00                   | 0.12 $\pm$ 0.05                   |
| <i>Col1a1</i> -cKO | <b>2.54 <math>\pm</math> 0.66</b> | 0.05 $\pm$ 0.02          | 1.88 $\pm$ 0.82 | 0.04 $\pm$ 0.01                   | <b>0.56 <math>\pm</math> 0.01</b> | 0.43 $\pm$ 0.13 | 2.22 $\pm$ 0.23                   | 32.95 $\pm$ 6.83                   | 0.08 $\pm$ 0.01                   |
| WT                 | 2.47 $\pm$ 0.62                   | 0.07 $\pm$ 0.03          | 2.74 $\pm$ 0.39 | <b>0.03 <math>\pm</math> 0.00</b> | 0.30 $\pm$ 0.02                   | 0.80 $\pm$ 0.12 | 2.46 $\pm$ 0.10                   | <b>40.23 <math>\pm</math> 2.53</b> | 0.11 $\pm$ 0.01                   |
| <i>Prx1</i> -cKO   | 4.00 $\pm$ 0.75                   | 0.32 $\pm$ 0.15          | 7.46 $\pm$ 2.40 | <b>0.06 <math>\pm</math> 0.00</b> | 0.44 $\pm$ 0.13                   | 1.18 $\pm$ 0.33 | 2.26 $\pm$ 0.05                   | <b>22.66 <math>\pm</math> 0.36</b> | 0.17 $\pm$ 0.05                   |

HA = Hydroxyapatite

TV = Tissue volume

BV = Trabecular bone volume

BV/TV = Trabecular bone volume fraction

Tb.Th = Trabecular thickness

Tb.Sp = Trabecular separation

Tb.N = Trabecular number

SMI = Structure model index

Tb.Pf = Trabecular pattern factor

BMD = Bone mineral density
