# Supplementary material
Source: PubMed Central journal article supplement (PMC5347426)
Supplement: Alpl_cKO_Supp_Table_3_6-27-16.pdf [file Alpl_cKO_Supp_Table_3_6-27-16.pdf]

**Appendix Table 3. Micro-CT analysis of dentolalveolar tissues in *Alpl* cKO vs. WT controls.** Mean values  $\pm$  standard deviation are shown for *Col1a1*- and *Prx1*-cKO mice and their respective WT controls (**n=2-3 for each genotype at 24 wks**), with statistically significantly different values ( $p < 0.05$  by independent samples t-test) indicated by bold type.

| Tissue                       | WT                | <i>Col1a1</i> -cKO                 | WT                | <i>Prx1</i> -cKO                  |
|------------------------------|-------------------|------------------------------------|-------------------|-----------------------------------|
| <b>Alveolar bone</b>         |                   |                                    |                   |                                   |
| TV ( $\mu\text{m}^3$ )       | 290.2 $\pm$ 25.2  | <b>240.6 <math>\pm</math> 10.7</b> | 289.4 $\pm$ 87.1  | 278.3 $\pm$ 15.0                  |
| BV ( $\mu\text{m}^3$ )       | 190.2 $\pm$ 11.2  | <b>102.3 <math>\pm</math> 8.5</b>  | 191.3 $\pm$ 102.5 | 105.8 $\pm$ 31.3                  |
| BV/TV (%)                    | 65.71 $\pm$ 2.64  | <b>42.62 <math>\pm</math> 4.42</b> | 63.66 $\pm$ 16.28 | 37.78 $\pm$ 9.22                  |
| TMD (mg HA/cm <sup>3</sup> ) | 1129 $\pm$ 9      | <b>1050 <math>\pm</math> 18</b>    | 1105 $\pm$ 96     | 1079 $\pm$ 61                     |
| <b>Crown dentin</b>          |                   |                                    |                   |                                   |
| TV ( $\mu\text{m}^3$ )       | 351.1 $\pm$ 37.3  | 351.7 $\pm$ 15.6                   | 364.3 $\pm$ 3.4   | 334.2 $\pm$ 16.9                  |
| BV ( $\mu\text{m}^3$ )       | 278.6 $\pm$ 17.7  | 256.8 $\pm$ 13.3                   | 319.4 $\pm$ 9.8   | <b>270.4 <math>\pm</math> 9.6</b> |
| BV/TV (%)                    | 79.60 $\pm$ 3.79  | 73.09 $\pm$ 4.34                   | 87.66 $\pm$ 1.87  | 80.92 $\pm$ 1.22                  |
| TMD (mg HA/cm <sup>3</sup> ) | 1310 $\pm$ 9      | 1325 $\pm$ 19                      | 1312 $\pm$ 12     | 1315 $\pm$ 30                     |
| <b>Root dentin</b>           |                   |                                    |                   |                                   |
| TV ( $\mu\text{m}^3$ )       | 650.6 $\pm$ 35.0  | 601.6 $\pm$ 63.1                   | 716.8 $\pm$ 42.9  | 659.2 $\pm$ 66.8                  |
| BV ( $\mu\text{m}^3$ )       | 540.5 $\pm$ 34.0  | <b>394.4 <math>\pm</math> 68.3</b> | 624.8 $\pm$ 36.0  | 560.2 $\pm$ 71.1                  |
| BV/TV (%)                    | 83.06 $\pm$ 22.30 | <b>65.24 <math>\pm</math> 4.57</b> | 87.18 $\pm$ 0.20  | 84.88 $\pm$ 2.18                  |
| TMD (mg HA/cm <sup>3</sup> ) | 1114 $\pm$ 23     | <b>1033 <math>\pm</math> 15</b>    | 1172 $\pm$ 31     | 1144 $\pm$ 25                     |
| Thickness ( $\mu\text{m}$ )  | 138 $\pm$ 6       | <b>92 <math>\pm</math> 6</b>       | 165 $\pm$ 1       | <b>141 <math>\pm</math> 7</b>     |
| <b>Enamel</b>                |                   |                                    |                   |                                   |
| TV ( $\mu\text{m}^3$ )       | 196.6 $\pm$ 23.9  | 192.5 $\pm$ 13.4                   | 198.6 $\pm$ 10.5  | 184.1 $\pm$ 14.0                  |
| BV ( $\mu\text{m}^3$ )       | 193.3 $\pm$ 23.6  | 188.6 $\pm$ 14.0                   | 195.2 $\pm$ 10.4  | 177.6 $\pm$ 10.7                  |
| BV/TV (%)                    | 98.31 $\pm$ 0.21  | 97.98 $\pm$ 0.44                   | 98.27 $\pm$ 0.04  | 96.48 $\pm$ 1.53                  |
| TMD (mg HA/cm <sup>3</sup> ) | 1911 $\pm$ 17     | 1908 $\pm$ 13                      | 1932 $\pm$ 37     | 1890 $\pm$ 18.54                  |

HA = hydroxyapatite

TV = Tissue volume

BV = Bone/dentin/enamel volume

BV/TV = Bone/dentin/enamel volume fraction

TMD = Tissue mineral density
